# Supplementary material
Source: Springer Nature journal article supplement (https://www.springermedizin.de/resource/supplementary/12913_2013_2970_MOESM2_ESM.pdf/9532474)

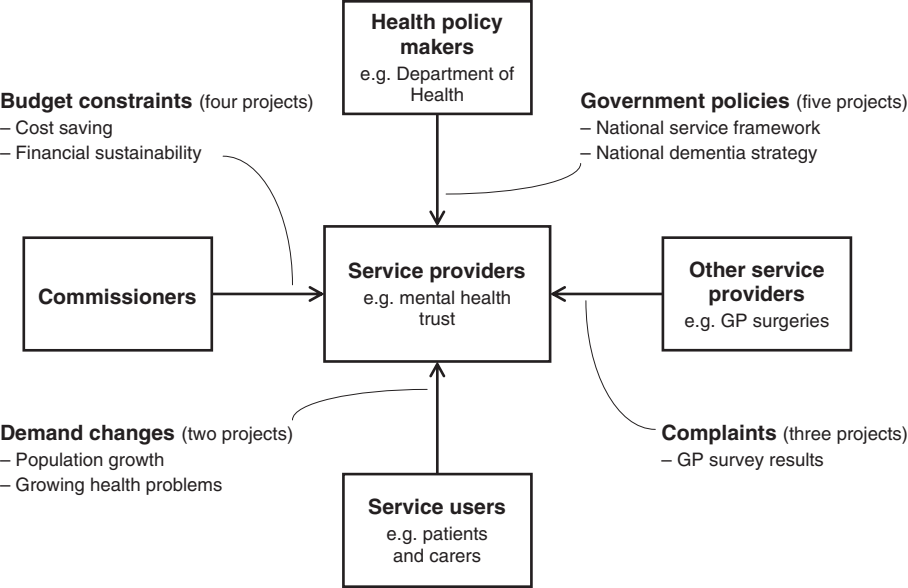

Supplement: MOESM2 [file 9532474]
